# Supplementary material
Source: publisher site journal article supplement (https://en-cdn.bio-protocol.org/attached/file/20180626/2922%20Appendix%202.docx)
Supplement: Supplementary file 1 [file 2922%20Appendix%202.docx]

**Appendix 2: FASTA protein sequences of competence proteins in *L. lactis* subsp. *cremoris* KW2**

>ComC_*Lactococcus*_*lactis*_*cremoris*_KW2_acession_number_AGV74021.1

MEILFLFIIGTIFGSFFGLLVDRIPAGESIIFGRSHCDSCNHILSFRDLIPLFSQLSSASLCRYCKSKIPLMNFILEFSVGLLFCLAWLNYLSLPQFLMSILSVILSAFDYRHHSFPFIIWLIFALSFIILFPSSLIFYSWLVLALLTEIFDFKIGSGDFLWFFTASFSISFFDEMKLLQIACLLGIIYYLMIKKRDEIAFIPFLTIAYLMLLFGHQILIW

>ComEA_*Lactococcus*_*lactis*_*cremoris*_KW2_acession_number_AGV73706.1

MEKILDKLKEYWKIMLLVVCALIAGGIFYIFTNSPKPAETLSVENLSSSSTKSSVSKFNSSSSEKNKNEIMVDLKGAVAKPNVYQISSDERLVDLIRQAGGFTDQADQKSINLSAKLKDEEVIYVPKVGESSSSESTDSPTGSSVSNQISTTSGPKVNINKADLTELQKLTGIGQKKAQDIIDFRMKNGDFKSIEDLGKVSGFGDKTLEKLKDEISID

>ComEC_*Lactococcus*_*lactis*_*cremoris*_KW2_acession_number_AGV73705.1

LIKFPLIFLTYLVVLLYFCIFTYNLPLLILFICSILLALFRKYYLMIPILIVFAVFFLLINSLSIRDNENQPKTLSKIELISDTIQVNGDLLSFQGRMNGQNYQVYDTLKSLKEKKFYQNLSQNCQLSFTGNLQIPETQRNFNGFDDQKYLASQNIYRQITIQQITNVEIKKNFDLHTLRRKAIVWTQNHFPKPMSDYMTGLLFGFLSKDFNQMSDIYSSLGIIHLFALSGMQVNFFIDWFRKILLRMGLTREIVNLVQIPFSIFYAFMTGLSVSVLRALFQKNIRLTSLDNIGVTTLVLMLISPKFLLTTGGQLTLFYAFVISMLNHPFSNLNGLKKVLTESAVLSLCVLPLLIFDFHIFQPLSILLTIIFGFLFDFMLLPLLLCCFLISFLGFSLNLNFIFQILEWLVHKVDLPLHYPFVLGKPSSLELIILFVLIGLFVDSFSHKKRRFFLVGFIFLFFFITKNPMRASITAVDIGQGDSIFLQDKFNKENILIDTGGRLALPQKNWQKAQTQSNADKTLIPYLESMGVAHIDQLILTHTDADHVGDFLSLADKIKIREIWVSPGELTNSSFVEKLKKAKIPIHVSKVGDKIPIFDSFLQVLSNGYTKKGDNNDSIVTYGNFYHTKFLFTGDLEQEGEKKLLQNYPKLQVDVLKVGHHGSKTSSSPEFIKEIHPKLALISVGKANRYGHPNQETLETLAKYQVKTLRTDQKGAIKLTEVNQQWQIKTVR

>ComFA_*Lactococcus*_*lactis*_*cremoris*_KW2_acession_number_AGV72992.1

MNLILENLLGHLLLEKDISAFNNFTDQVNNENKLIKIGAMTSVNANKVRCNRCGTIHIKTNVKLPIGAFFCPTCLELGRVRSDEYFYHLPQQDFPEKTYLRWTGKLTENQEKISDALCQQITNNQKLLVQAVTGAGKTEMIYQLIEQILSHGGSVGLASPRIDVCIELHQRLSRDFTCQIPLLYHEGDSYFRSPLVVMTSHQLLRFKEAFDLLIIDEVDAFPFRDNDMLYFALENAKKINGTLLYLTATSTDKLDKQIKKHEIKRLFLPRRFHGHPLVIPMFFWKKTFYKKFIEQRKTGFPLLIFVAEIDFGQDFAKNLQEKFPKEKMAFVASTTKSRKTIVEAFRKKQVSILITTSILERGVTFSSIDVFVINSEHPNFTKSALIQMAGRVGRDSKRPTGLVSFFHSGKSLAMCQAQKEIKKMNRLGGF

>ComFC_*Lactococcus*_*lactis*_*cremoris*_KW2_acession_number_AGV72991.1

MQTCLLCSRIIKQTLTFSEFFLLKNKRNLICNKCQSLFKKIPNERCPRCSKSNSKGICADCIKWEEKGIIVNHQAIFIYNQEMKDYFSLYKFMGDYRLHEVFDSYFKNLSKKIPLVPIPVSPKRLQERGFNQVTAFLKDRTYLDLLEKEDTVRQSSLNREGRLSTTNPFKLKEGEKIPQKIILIDDIYTTGTTFYHAIKTLKKANPIEITTFSLCR

>ComGA_*Lactococcus*_*lactis*_*cremoris*_KW2_acession_number_AGV74123.1

MVQKKAQELIQKAIEMEASDIYLIASGNLYKIYIRQQLGRTLIEEVNQEIGLALLTHFKFLAGMNTGERRRVQLGACWYELEGSSAKRLRLSTVGDFEGNESLVIRLLHDQKQELEFWFDDKLQDFRCKRGLYLFAGPVGSGKTSLMFDLAHRHFSNAQVITIEEPVELIDSDFIQLQVNDVIGNSYDELIKLSLRHRPDLLIVGEIRDQQTARAVLRASLTGYTVFSTIHAASVKGVVQRLLELGLSDWELKNGLEAVVYQRLIAGKGVLDIAKSKFDTWSPKKWNEKIENLYANGHLTAIEAEREKISINQASKIDTTDGESFE

>ComGB_*Lactococcus*_*lactis*_*cremoris*_KW2_acession_number_AGV74122.1

LNNGFNLGEVINFLALSKLVEKEFVFKMHQGLSSGKSLSEILESLSFSKNVVTQLALVEVHGNLVGTMQLVELHLKKQLKVKKKLIEVATYPVVLLVFLIGIMWGLKNYLLPQLDKGNNFATLLINHLPLVFFSVGALIVLLTSLSIIIFKHISALTNFTFLVKVPLVSSFIRLYLTAYFSREWGNLIAQGVELRQIIELMKKQKSRIFAEVGIKLDLGLKAGQNFEQAVSHFSIFLPELSLMIEYGAIKDKLGLELSVYADECWEQFFSKIDRLMQLIQPLIFIFVALMIVLLYAAMLLPIYSNMGSGI

>ComGC_*Lactococcus*_*lactis*_*cremoris*_KW2_acession_number_AGV74121.1

MKIENITLIMSKALSLVKIHGRKLCQKKQKAFTLIEMLIVLAIISILILLFVPNLIKEKAQVQKTGEAAVVKVVESQAQLYELDHDNDKPNLSELLSAGMITQKQVTAYDDYYDQNKNEQRNFDD

>ComGD_*Lactococcus*_*lactis*_*cremoris*_KW2_acession_number_AGV74120.1

MTRIKMNSAISMIRAFTLLESLLVLLIVSFITLFFSAELTQTVHLFKGELFVLQFENLYKISQENAALQSSPENLGSKNGKLIYENKEIDIPKEVEMVEFLIKFDEKGENSSLQKIKVYLPYEKKTILYQMEMGSGKYKKKIN

>ComGE_*Lactococcus*_*lactis*_*cremoris*_KW2_acession_number_AGV74119.1

MALLSFLVTFLLSSLTNSRQQEAQENQQIESLNVAQMAIESQLTELSLNGSVIKIRQDSTATIISDHGKEILRLEAQN

>ComGF_*Lactococcus*_*lactis*_*cremoris*_KW2_acession_number_AGV74118.1

MRSELSGAKLDNVNQNFLYVTKDKKLRFGLVGDDFRKSDDKGQGYQPMLYDLKGAKIQAEENLIKITIDFDNGGERVFIYRFTDTK

>ComGG_*Lactococcus*_*lactis*_*cremoris*_KW2_acession_number_AGV74117.1

MVSLALKKDLKTSGQLNFDCGNLTYKLLTDLSADSTSGGQTVSNKTYCFDVRLKDGRIFQIKK

>comX_*Lactococcus*_*lactis*_*cremoris*_KW2_acession_number_AGV74143.1

MTYYLEENEFEGLFSGMKPIIRKLMKQIRIKAWDIEDYYQEGMIILHHLLEENHPSTNIYTKFKVKYHQRLIDELRHSYAKKRLHDHFVGLDIYECSDWIDAGGSTPESELVFNHLLVEVYEGLSAHYQELLVRQMRGEELTRMERYRLREKIKNILFSRDDD

>CoiA_*Lactococcus*_*lactis*_*cremoris*_KW2_acession_number_AGV73660.1

MRTAIDENNKIINLLELDRKELTGKFYCPSCHSELLIKNGQIKVLHFAHKSLKSCNLWLENESEQHLGLKKILYQWFKRTDKVEIERYLPELNQRPDLLVNDKIAIEIQCSHLSIKRLKERTENYKTHGFKVLWLMGKDLWLAEQVTELQKNLVYFSENRGFFYWELDFQRKKLRLKSLIHEDLRGRIICLQEEIPFGKGRLIAHLRLPYLAQKLVKIPTFKDSKLSSFIRQQLYYQSPKWMKIQEKYYQKGENLLTKKFEGPYIAPLGLNLLENFTDEMTITTFTQIDQNVKLYYENFLINFQRNSLEMLYPPRSYAIMGKQKKEK

>SsbA_*Lactococcus*_*lactis*_*cremoris*_KW2_acession_number_AGV72374.1

MNKTMLIGRLTNAPEISKTTNNKSYVRVTLAVNRRFKNEKGEREADFISIILWGKSAETLVSYAKKGSLISVEGEIRTRNYTDKNEQKHYITEILGLSYDLLESRATLALRESAVKTEELLLEADELPF

>SsbB_*Lactococcus*_*lactis*_*cremoris*_KW2_acession_number_AGV74186.1

MINNVVLVGRITRDPELRYTPQNQAVATFSLAVNRQFKNANGEREADFINCVIWRQQAENLANWAKKGALIGVTGRIQTRNYENQQGQRVYVTEVVADSFQMLESRSARDGMGGGASAGSYSAPSQSTNNTPRPQTNNNSATPNFGRDADPFGSSPMEISDDDLPF

>RecA_*Lactococcus*_*lactis*_*cremoris*_KW2_acession_number_AGV72340.1

LATKKKTNFDDITKKYGAERDKALADALALIEKDFGKGSLMRLGEAANQKVSVVSSGSLALDIALGAGGYPKGRIVEIYGPESSGKTTVALHAVAAVQKEGGIAAFIDAENALDPEYAKALGVNIDELLLSQPDYGEQGLQIAEKLITSGAVDLVVIDSVAALVPKAEIDGEIGDSSVGLQARMMSQAMRKLAGHINKTKTTAIFINQLREKVGVMFGSPETTPGGRALKFYASVRLDVRGSTKIEEGSGDNKTQIGKITKIKVVKNKVAPPFKVALVDIMFGEGISSTGELLNIAVEEGIIKKSGAWFAYNDEKIGQGAEKAKNYLKEHQDVFDEIDHKVRAAHGLLDDSEVAETEEETTASKTKAKAKKEEKAVETEEIELELED

>DprA_*Lactococcus*_*lactis*_*cremoris*_KW2_acession_number_AGV73150.1

MITNFDLFRWKKAGMTNLGVNKLLKFFRKYDRKISLRQMGQVAQVKSIPNFIEQYKNQDVKKLRADYKKFSSFSILDDLYPERLREIYNPPVLIFYQGNIDLLKNPKLAFVGSRLAGQSGIKSVQKIVTELNQSFTIVSGLAKGIDTASHLSAIKTKTPTIAVIGTGLDIFYPLENRKIQEYLAKYQLVLSEYSLGEKPLKYHFPERNRIIAGLSRGVVVVEAKLRSGSLITCERALEEGRDIFAIPGNIADGTSDGCNHLIQQGAKLVYQAQDILEEYLYN
